# Supplementary material for: Effect of Nitrogen Doping on the Crystallization Kinetics of Ge2Sb2Te5
Source: MDPI journal article supplement (doi:10.3390/nano11071729), 2021-06-30
Supplement: s1 [file s1]

## Supplementary Materials

# Effect of Nitrogen Doping on the Crystallization Kinetics of $\text{Ge}_2\text{Sb}_2\text{Te}_5$

Minh Anh Luong <sup>1</sup>, Nikolay Cherkashin <sup>1</sup>, Béatrice Pecassou <sup>1</sup>, Chiara Sabbione <sup>2</sup>, Frédéric Mazen <sup>2</sup> and Alain Claverie <sup>1,\*</sup>

<sup>1</sup> CEMES—CNRS, 29 Rue Jeanne Marvig, 31055 Toulouse, France; minh-anh.luong@cemes.fr (M.A.L.); nikolay.cherkashin@cemes.fr (N.C.); beatrice.pecassou@cemes.fr (B.P.)

<sup>2</sup> Léti/CEA, 17 Avenue des Martyrs, F-38000 Grenoble, France; chiara.sabbione@cea.fr (C.S.); frederic.mazen@cea.fr (F.M.)

\* Correspondence: alain.claverie@cemes.fr

### 1. TEM EDX Analyses of the As-Deposited 500 nm Thick $\text{Ge}_2\text{Sb}_2\text{Te}_5$ Sample

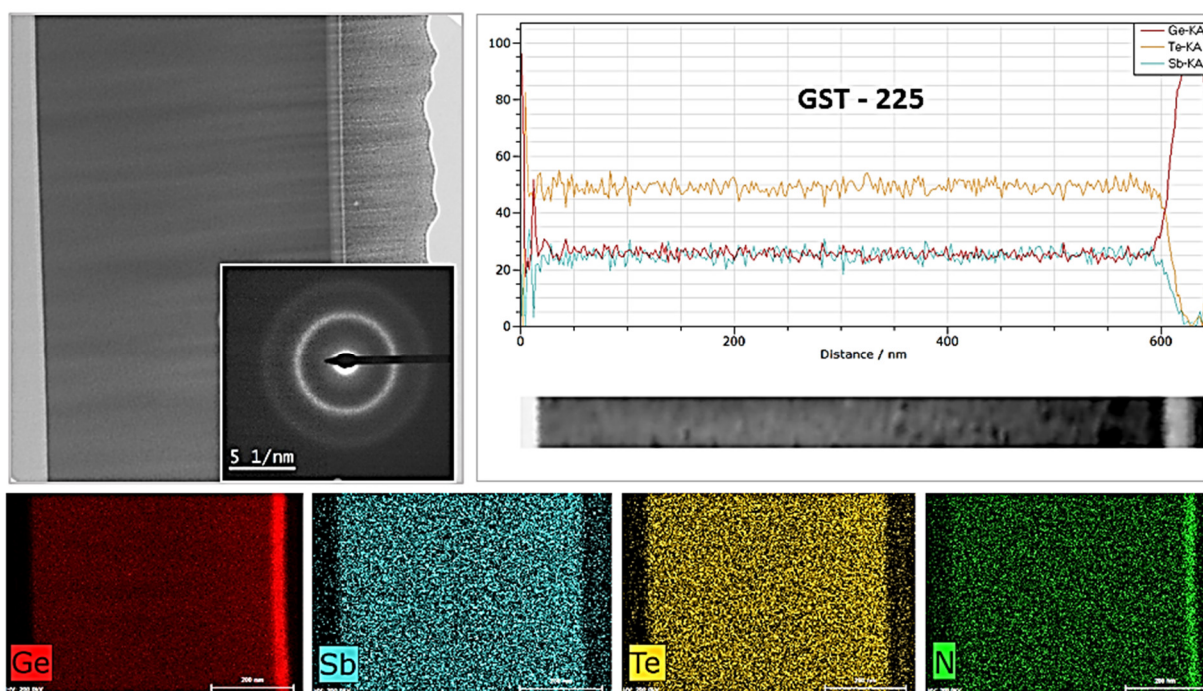

**Figure S1.** BF-TEM image of the as-deposited 500 nm thick  $\text{Ge}_2\text{Sb}_2\text{Te}_5$  specimen and associated chemical mapping obtained by EDX. Ge, Sb, Te and N are displayed in red, blue, yellow and green, respectively.

## 2. TEM EDX Analyses of the N Implanted $\text{Ge}_2\text{Sb}_2\text{Te}_5$ Sample

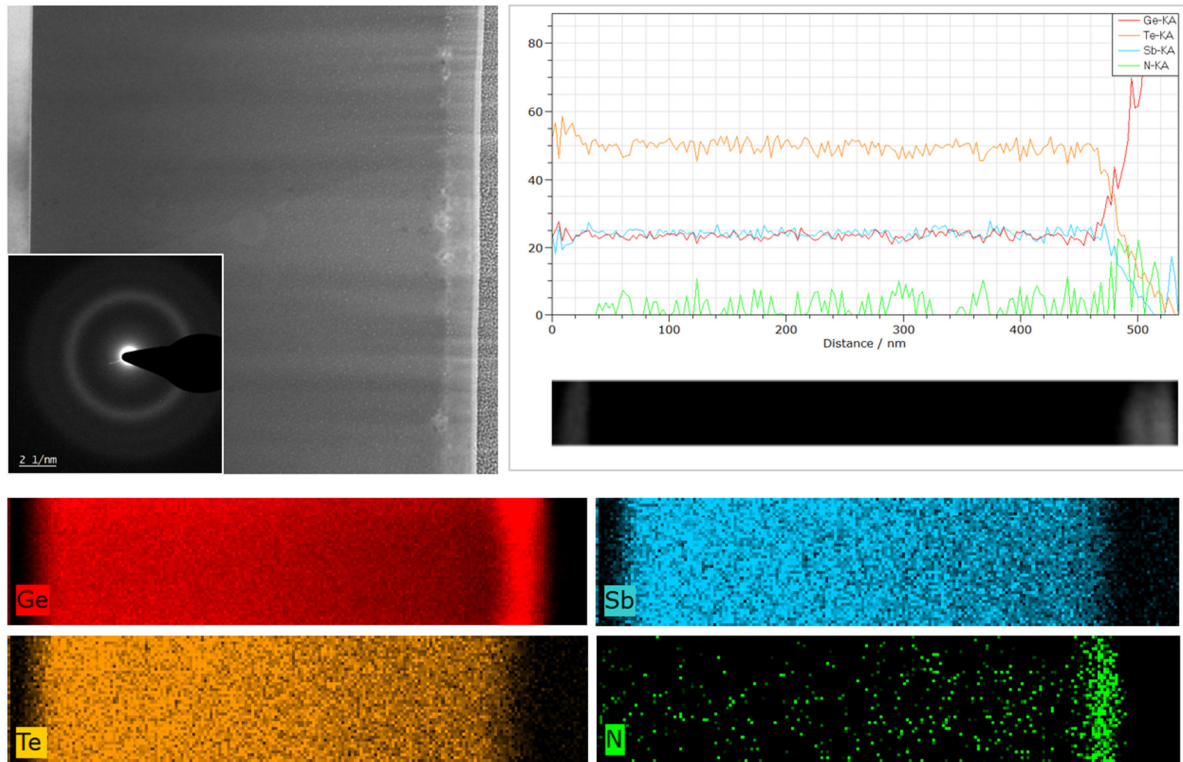

**Figure S2.** BF-TEM image of the N implanted  $\text{Ge}_2\text{Sb}_2\text{Te}_5$  sample and associated chemical mapping obtained by EDX. Ge, Sb, Te and N are displayed in red, blue, yellow and green, respectively. Few voids are seen at the interface between GST and GeN. The EDX line-scan shows traces of N in the implanted region, close to the detection limit.

### 3. BF and DF TEM Images of the Samples Annealed “ex-situ” at Different Temperatures

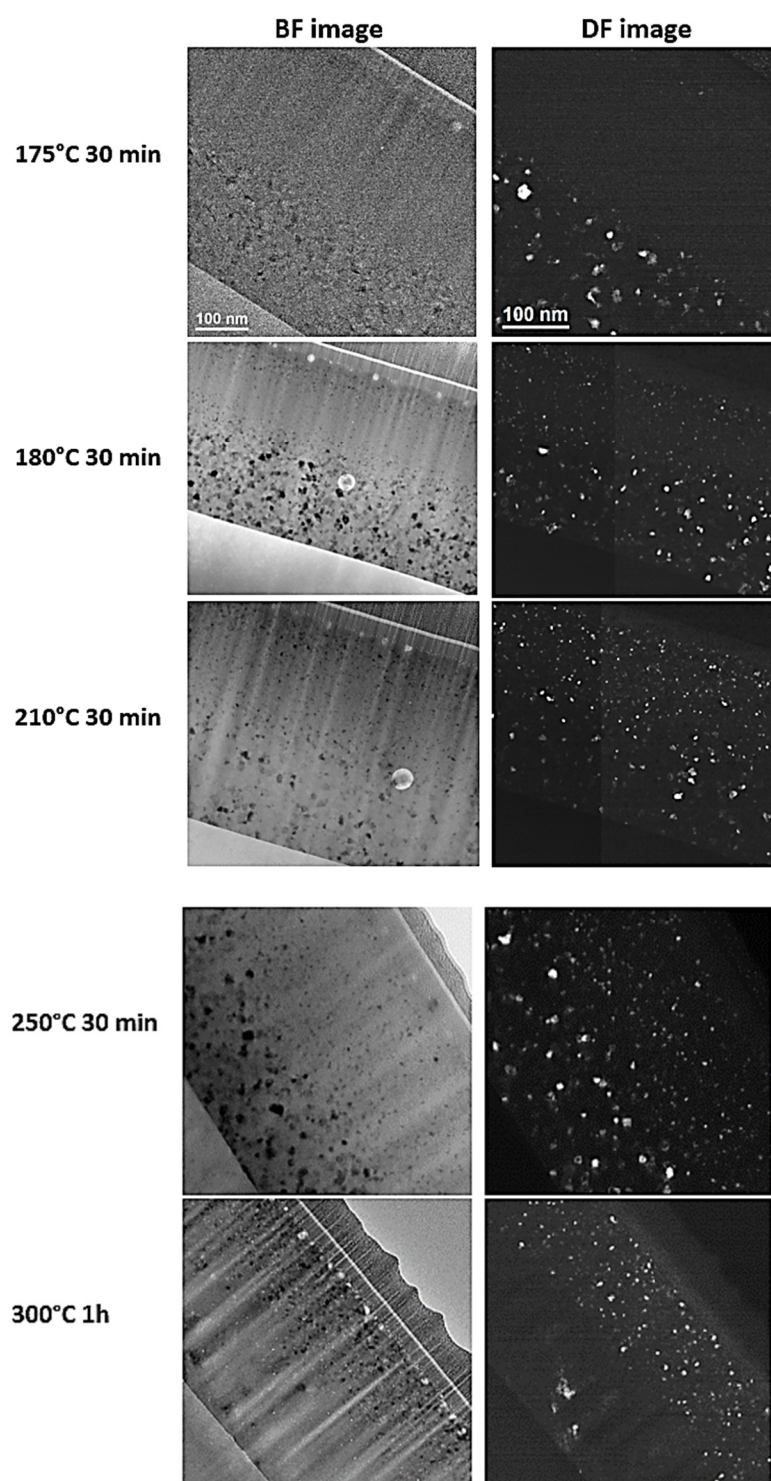

**Figure S3.** Set of BF/DF TEM images of N implanted  $\text{Ge}_2\text{Sb}_2\text{Te}_5$ , annealed at different temperatures and durations.
