# Supplementary material for: Effect of Nitrogen Doping on the Crystallization Kinetics of Ge2Sb2Te5
Source: Nanomaterials (Basel). 2021 Jun 30;11(7):1729. doi: 10.3390/nano11071729 (PMC8308197; doi:10.3390/nano11071729)
Supplement: Supplementary file 1 [file nanomaterials-11-01729-s001.zip]

Archive with 5 entries (5 files):
- Supplementary Materials.pdf
- Video S1 pure GST225 specimen- taken at 320ípC-25 fps- speed x5.mp4
- Video S2 N implanted GST225- taken at 140ípC-25 fps-speed x15.mp4
- Video S3 N implanted GST225- taken at 330ípC-25 fps-speed x2.mp4
- Video S4 N implanted GST225- taken at 400ípC-25 fps-speed x4.mp4
